# Supplementary material for: The Effect of Ramadan Fasting on the Coping Strategies Used by Male Footballers Affiliated with the Tunisian First Professional League
Source: MDPI journal article supplement (doi:10.3390/healthcare11071053), 2023-04-06
Supplement: s1 [file s1]

**Supplementary Table S1:** Questionnaire for the assessment of coping strategies employed by athletes in competitive sport.

| No | Items                                                                        | Never | Scarcely | Moderately | Mostly | Always |
|----|------------------------------------------------------------------------------|-------|----------|------------|--------|--------|
| 1  | I visualized that I was in full control of the situation                     |       |          |            |        |        |
| 2  | I swore (swearing, profanity, etc.) in my head or out loud to vent my anger  |       |          |            |        |        |
| 3  | I distanced myself from other athletes                                       |       |          |            |        |        |
| 4  | I applied myself by providing a constant effort                              |       |          |            |        |        |
| 5  | I occupied my mind to think about something other than the competition       |       |          |            |        |        |
| 6  | I tried not to be intimidated by other athletes                              |       |          |            |        |        |
| 7  | I asked for advice regarding my mental preparation                           |       |          |            |        |        |
| 8  | I tried to relax my body                                                     |       |          |            |        |        |
| 9  | I analyzed my past performance                                               |       |          |            |        |        |
| 10 | I lost all hope of being able to achieve my goal                             |       |          |            |        |        |
| 11 | I mentally rehearsed the execution of my movements                           |       |          |            |        |        |
| 12 | I got angry                                                                  |       |          |            |        |        |
| 13 | I isolated myself in a place conducive to reflection                         |       |          |            |        |        |
| 14 | I made a strenuous effort                                                    |       |          |            |        |        |
| 15 | I thought about my favorite hobbies so as not to think about the competition |       |          |            |        |        |
| 16 | I tried to eliminate my doubts by thinking about positive things             |       |          |            |        |        |
| 17 | I asked advice from other athletes                                           |       |          |            |        |        |
| 18 | I tried to reduce my muscle tension                                          |       |          |            |        |        |
| 19 | I analyzed the weaknesses of my opponents                                    |       |          |            |        |        |
| 20 | I gave in to discouragement                                                  |       |          |            |        |        |
| 21 | I imagined myself putting on a good performance                              |       |          |            |        |        |
| 22 | I expressed my displeasure                                                   |       |          |            |        |        |
| 23 | I made a void around me                                                      |       |          |            |        |        |
| 24 | I gave my maximum effort                                                     |       |          |            |        |        |
| 25 | I did fun things to keep my mind off the competition                         |       |          |            |        |        |
| 26 | I replaced my negative thoughts with positive ones                           |       |          |            |        |        |
| 27 | I confided in a trustworthy person                                           |       |          |            |        |        |
| 28 | I did relaxation exercises                                                   |       |          |            |        |        |
| 29 | I thought of possible solutions to handle the situation                      |       |          |            |        |        |
| 30 | I wanted the competition to end immediately                                  |       |          |            |        |        |
| 31 | I visualized my best performance ever                                        |       |          |            |        |        |
| 33 | I sought silence                                                             |       |          |            |        |        |
| 34 | I thought about my successes rather than my mistakes                         |       |          |            |        |        |
| 35 | I talked to someone who is able to motivate me                               |       |          |            |        |        |
| 36 | I relaxed the muscles of my body                                             |       |          |            |        |        |
| 37 | I have analyzed the requirements of the competition                          |       |          |            |        |        |
| 38 | I stopped believing in my ability to achieve my goal                         |       |          |            |        |        |
| 39 | I thought of my family or my friends to distract me                          |       |          |            |        |        |
